# Supplementary material
Source: Springer Nature journal article supplement (https://www.springermedizin.de/resource/supplementary/13024_2010_171_MOESM5_ESM.pdf/9643576)

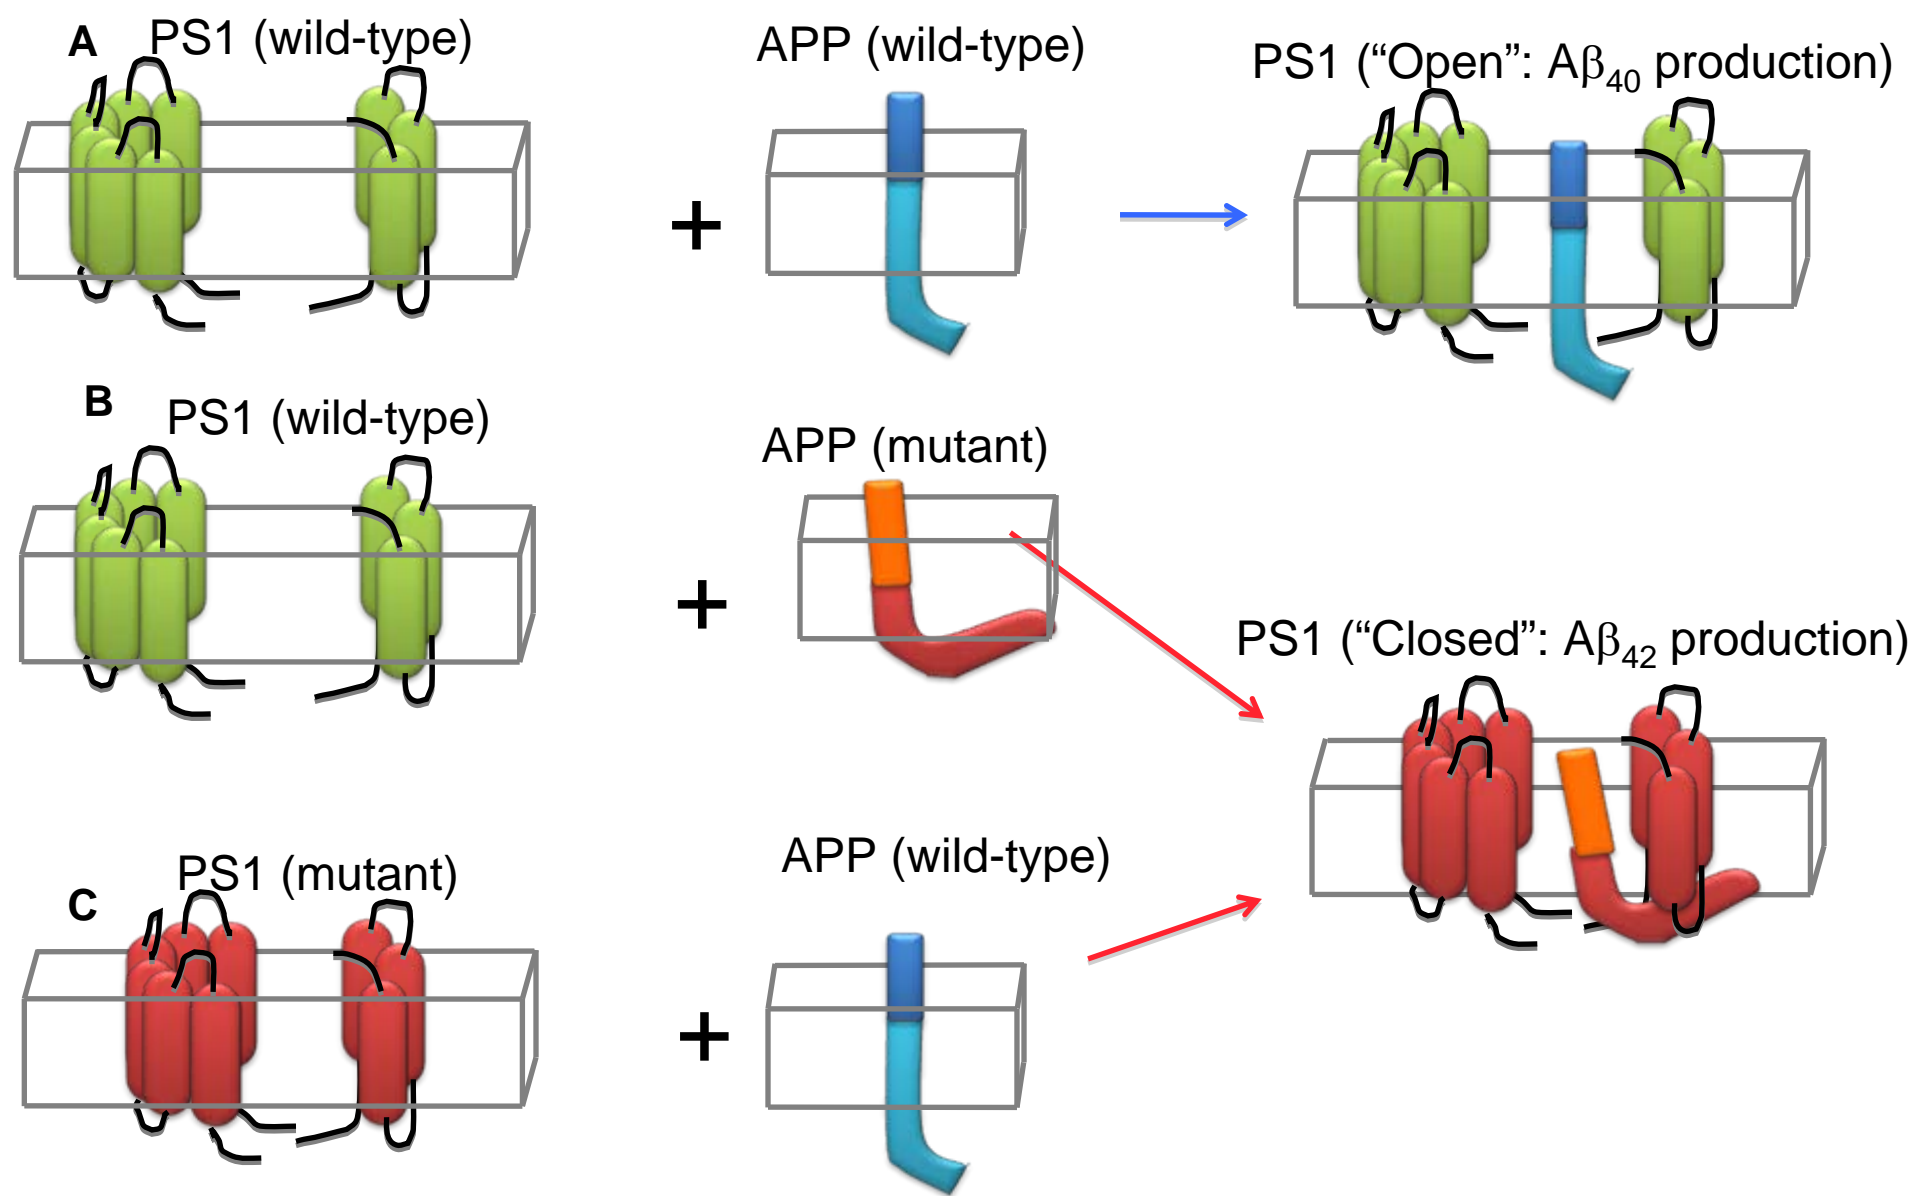

Supplement: MOESM5 [file 9643576]
